# Supplementary material
Source: PubMed Central journal article supplement (PMC3080811)

## Rovillain\_Supp Fig1.

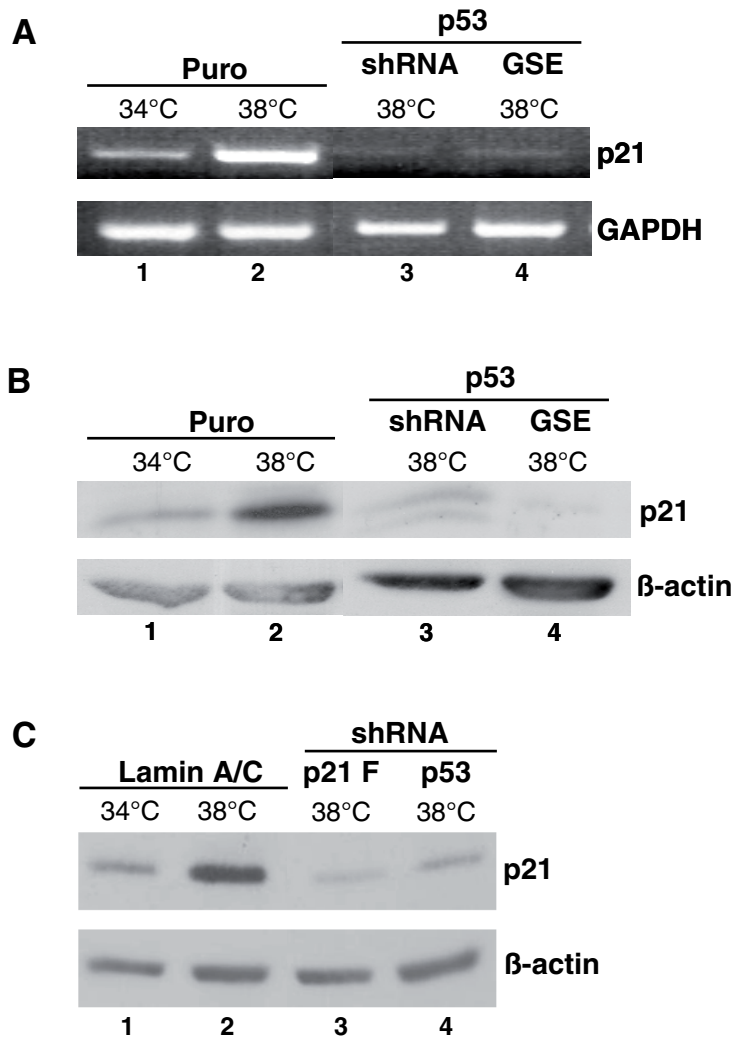

## Rovillain\_Supp Fig2.

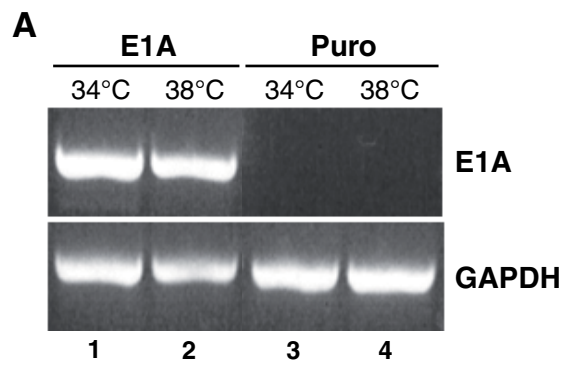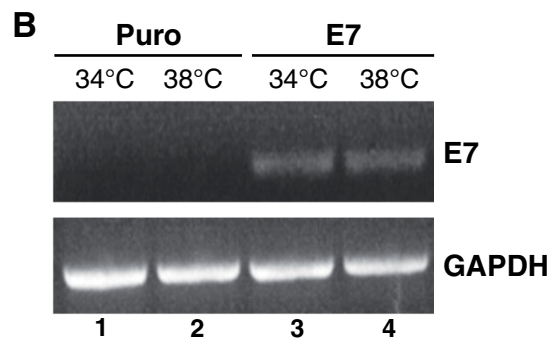

Rovillain\_Supp Fig3.

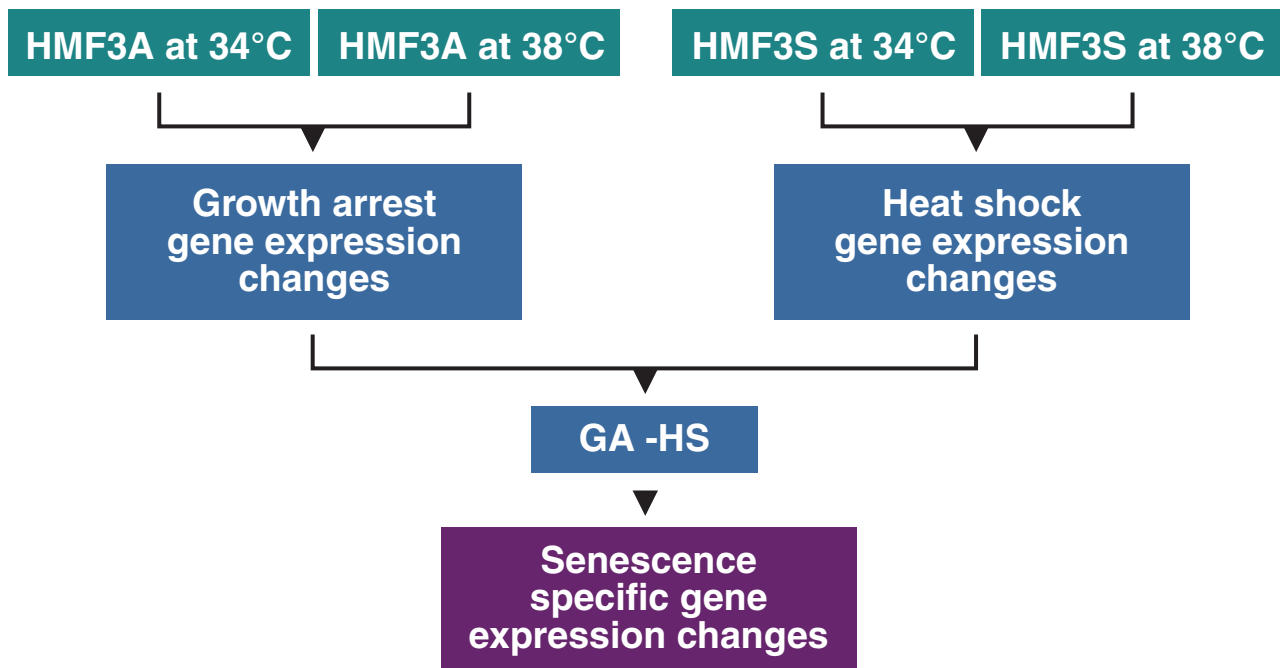

**Rovillain\_Supp Fig4.**

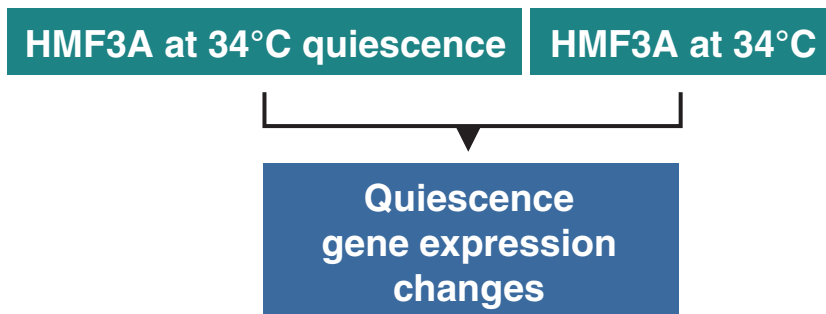

Rovillain\_Supp Fig5.

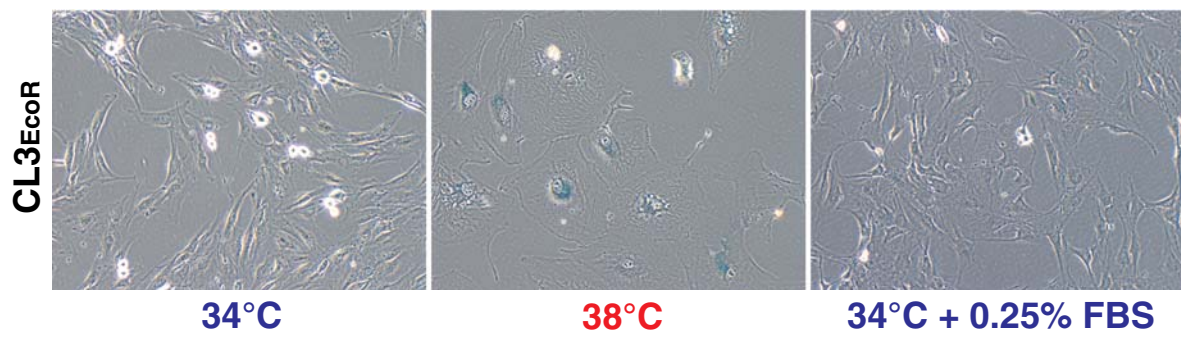

Rovillain\_Supp Fig6.

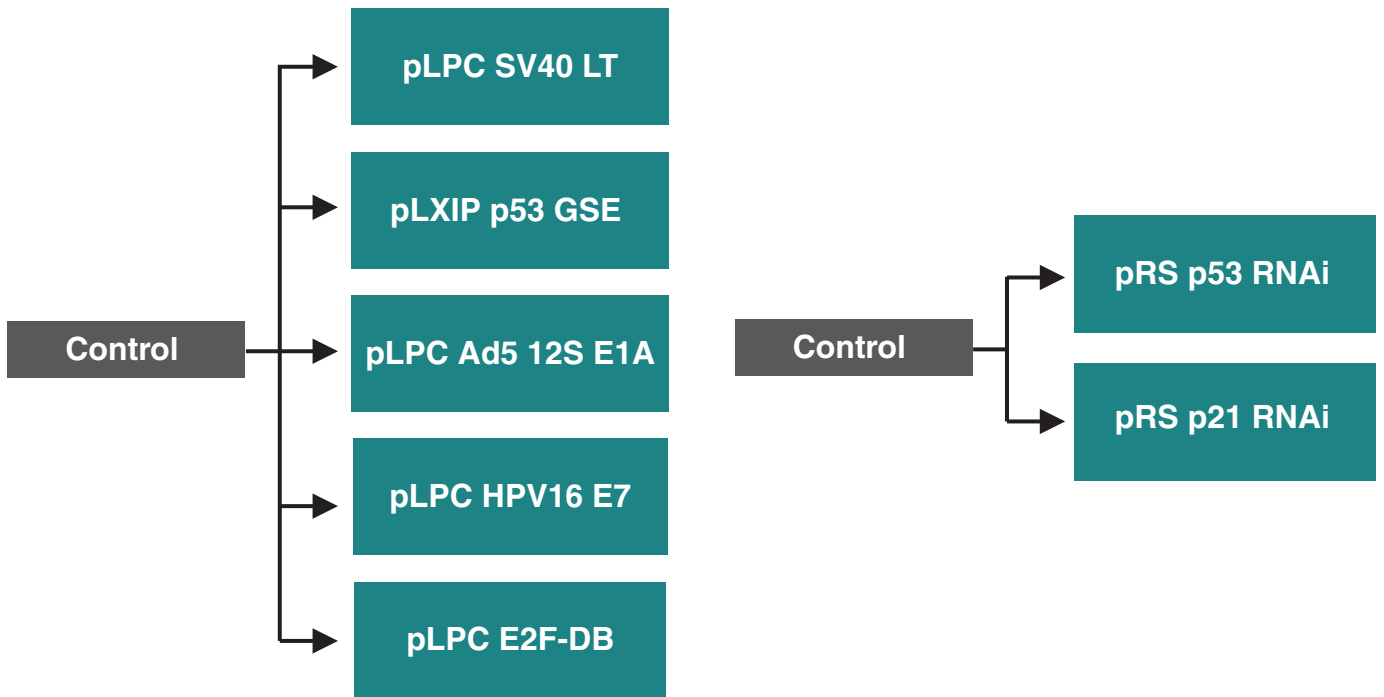

# Rovillain\_Supp Fig7.

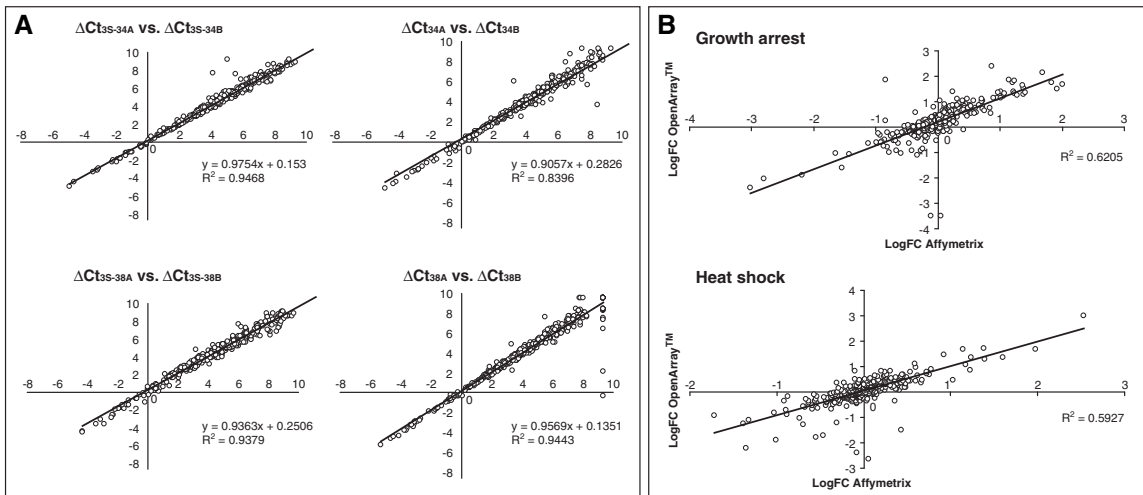

Supplement: NIHMS33706-supplement-1.pdf [file NIHMS33706-supplement-1.pdf]
